# Supplementary material
Source: Springer Nature journal article supplement (https://www.springermedizin.de/resource/supplementary/12872_2013_683_MOESM8_ESM.pdf/9430648)

**A****Day 0****Day 6****Undepleted**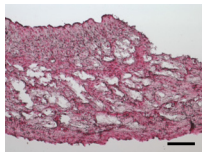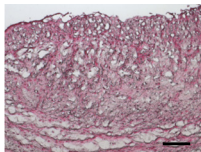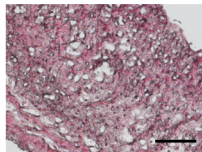**Collagenase**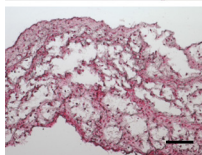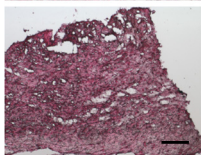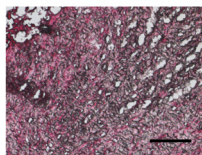**B**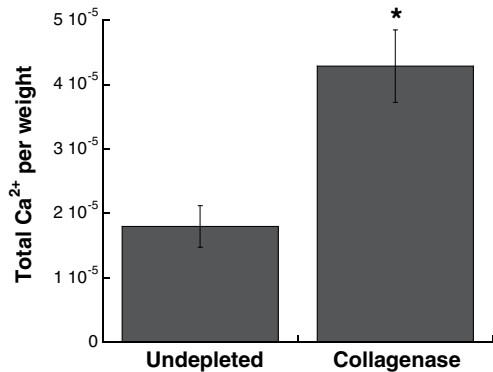

Supplement: MOESM8 [file 9430648]
